# Supplementary material for: Stimuli responsive aggregation-induced emission of bis(4-((9H-fluoren-9-ylidene)methyl)phenyl)thiophene single crystals
Source: Royal Society of Chemistry journal article supplement (doi:10.1039/c9qm00198k), 2019-01-01
Supplement: c9qm00198k1.pdf [file c9qm00198k1.pdf]

## Electronic Supplementary Information (ESI)

### **Stimuli Responsive Aggregation-Induced Emission of Bis(4-((9H-fluoren-9-ylidene)methyl)phenyl)thiophene Single Crystals**

Maxim S. Kazantsev, Alina A. Sonina, Igor P. Koskin, Peter S. Sherin,  
Tatyana V. Rybalova, Enrico Benassi and Evgeny A. Mostovich

#### **Content**

|                                       |    |
|---------------------------------------|----|
| 1. Characterisation.....              | 2  |
| 2. Microscopy.....                    | 3  |
| 3. Thermal analysis .....             | 5  |
| 4. X-ray data.....                    | 6  |
| 5. Optical data .....                 | 8  |
| 6. Quantum Chemical Calculations..... | 9  |
| 7. References .....                   | 24 |

## 1. Characterisation

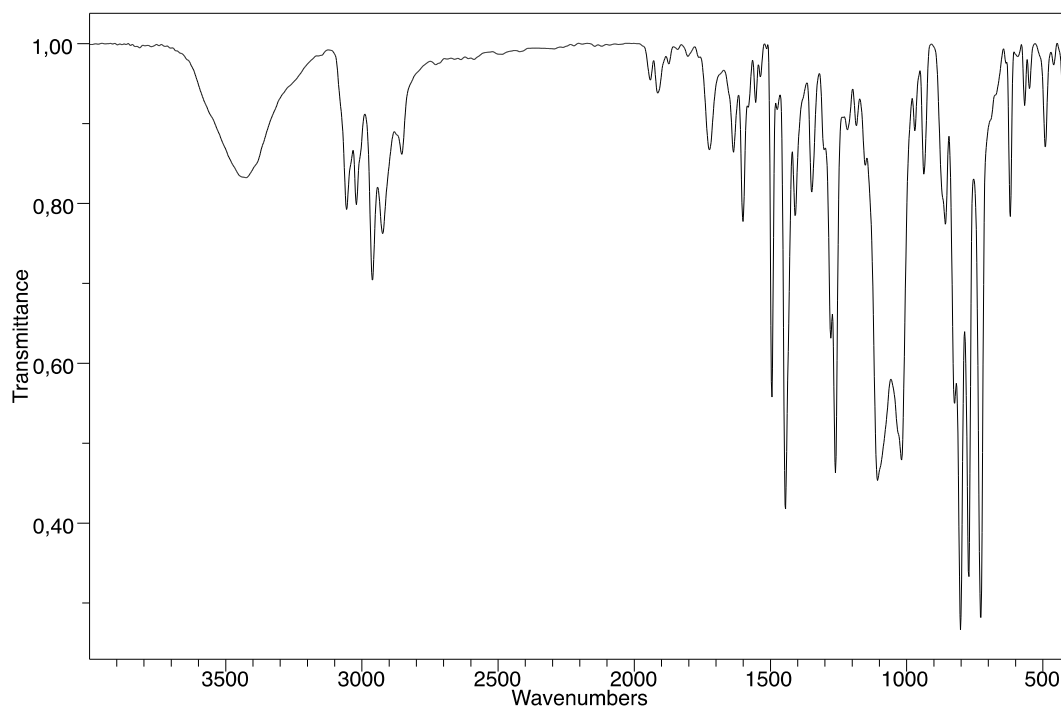

**Figure S1.** FT-IR spectrum of **BFMPT** recorded in KBr.

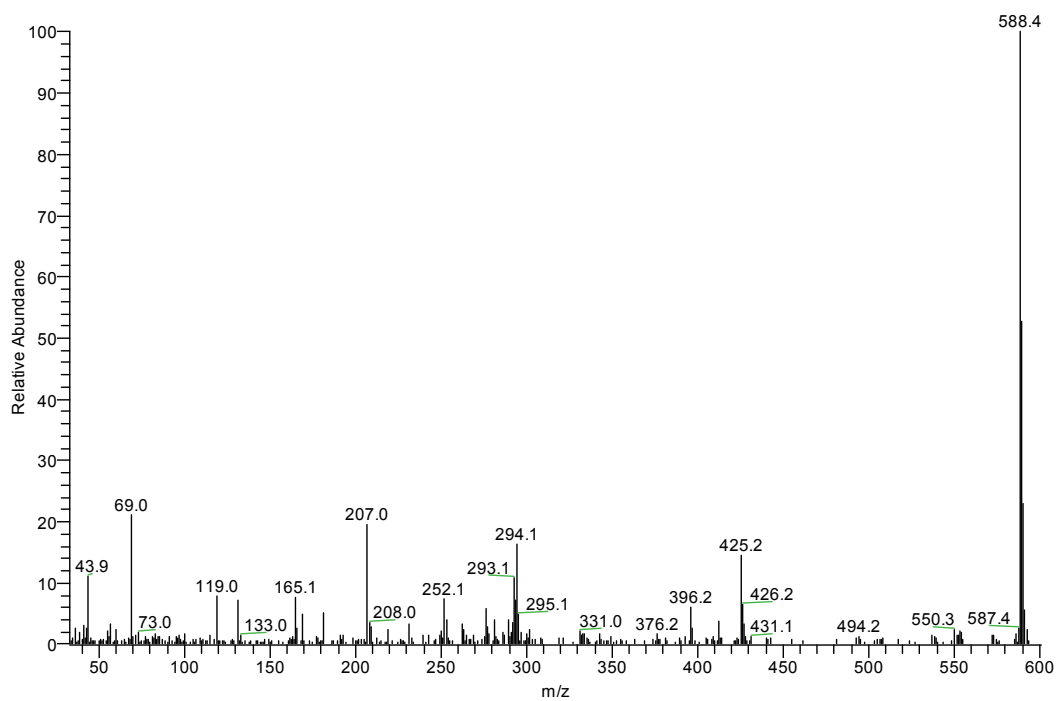

**Figure S2.** HR-MS spectrum of **BFMPT**.

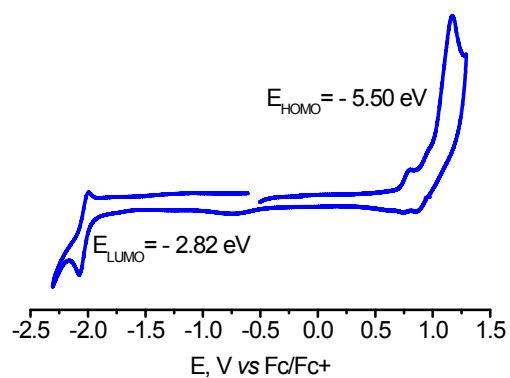

**Figure S3.** Cyclic voltammogram of BFMPT in  $\text{CH}_2\text{Cl}_2$  solution.

## 2. Microscopy

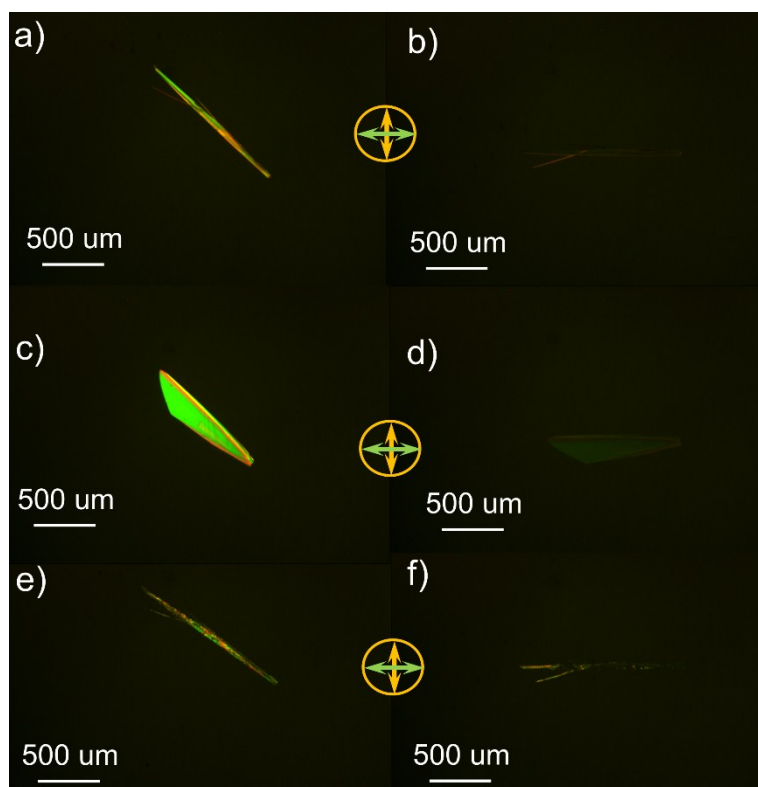

**Figure S4.** Optical images of the crystals in transmitted light through the crossed polarizers upon rotation of the sample holder; a, b) Form I; c, d) Form II; e, f) Form I after heating at  $280^\circ\text{C}$  for 5 seconds; the arrows indicate the orientation of polarizer (orange) and analyzer (green).

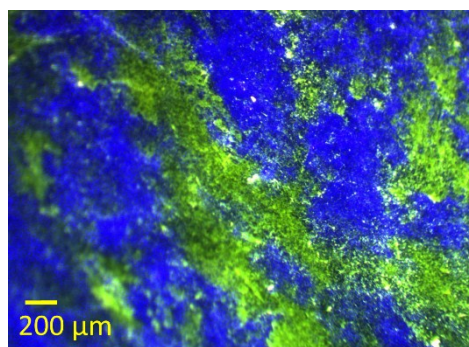

**Figure S5.** Optical image under blue laser irradiation (405 nm) of form I crystals after grinding in a mortar.

### 3. Thermal analysis

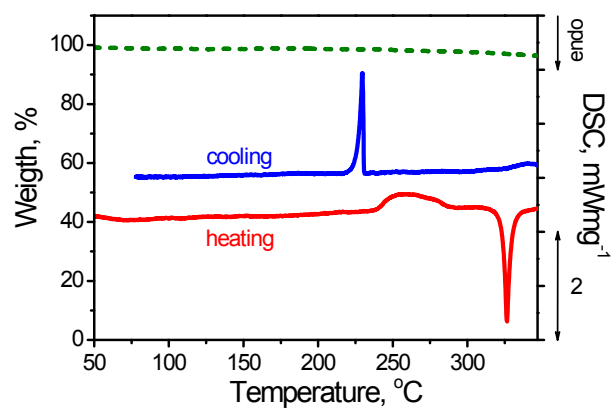

**Figure S6.** Thermogravimetric (olive dashed line) and differential scanning calorimetry (solid lines) analyses of the mixture of forms I and II in Ar atmosphere.

## 4. X-ray data

**Table S1.** Crystal data, data collection and structure refinement parameters for crystal structures of BFMPT.

|                                                           | Form I                                   | Form II                                  |
|-----------------------------------------------------------|------------------------------------------|------------------------------------------|
| Chemical formula                                          | $C_{44}H_{28}S$                          |                                          |
| $M_r$                                                     | 588.72                                   |                                          |
| Cryst. system, space group                                | Triclinic, $P-1$                         | Monoclinic, $P2_1/c$                     |
| $a, b, c$ (Å)                                             | 9.7394 (3), 9.8279 (3), 16.0542 (5)      | 15.4125 (9), 9.8016 (5), 20.925 (1)      |
| $\alpha, \beta, \gamma$ (°)                               | 96.661 (1), 100.097 (1), 92.178 (1)      | 90.00, 105.660(2), 90.00                 |
| $V$ (Å <sup>3</sup> )                                     | 1499.98 (8)                              | 3043.7(3)                                |
| $Z$                                                       | 2                                        | 4                                        |
| Density <sub>calcd</sub> (Mg.m <sup>-3</sup> )            | 1.303                                    | 1.285                                    |
| F(000)                                                    | 616                                      | 1232                                     |
| Crystal size (mm)                                         | 0.67 × 0.18 × 0.03                       | 1.00 × 0.50 × 0.02                       |
| $\mu$ (mm <sup>-1</sup> )                                 | 0.14                                     |                                          |
| $T_{min}, T_{max}$                                        | 0.844, 0.862                             | 0.851, 0.862                             |
| $\Theta$ range for data collection (°)                    | 3.046-25.10                              | 2.937-25.027                             |
| Index ranges                                              | -11 ≤ h ≤ 11, -11 ≤ k ≤ 11, -19 ≤ l ≤ 19 | -18 ≤ h ≤ 18, -11 ≤ k ≤ 11, -24 ≤ l ≤ 24 |
| No. of reflections measured                               | 43942                                    | 35165                                    |
| independent                                               | 5296                                     | 5367                                     |
| observed [ $I > 2\sigma(I)$ ]                             | 4021                                     | 3983                                     |
| No. of parameters                                         | 406                                      |                                          |
| $R_{int}$                                                 | 0.039                                    | 0.048                                    |
| $R[F^2 > 2\sigma(F^2)], wR(F^2)$                          | 0.036, 0.094                             | 0.044, 0.116,                            |
| Goodness of fit, $S$                                      | 1.03                                     | 1.04                                     |
| $\Delta\rho_{max}, \Delta\rho_{min}$ (e Å <sup>-3</sup> ) | 0.18, -0.19                              | 0.22, -0.16                              |

**Table S2.** The intermolecular C-H... $\pi$  and  $\pi$ ... $\pi$  interactions in the crystals of BFMPT. (cycle numbering is shown in figure 2)

| Form              | C-H... $\square$ interaction        | H...Cg* (Å)   | $D_{pln}$ * (Å)  | C-H...Cg* (°) |
|-------------------|-------------------------------------|---------------|------------------|---------------|
| I                 | C20a-H...Cg(1)                      | 2.97          | 2.81             | 133           |
|                   | C28b-H...Cg(3)                      | 2.99          | 2.98             | 129           |
|                   | C13-H...Cg(6a)                      | 2.76          | 2.72             | 146           |
|                   | C16-H...Cg(6a)                      | 2.94          | 2.78             | 149           |
|                   | C26a-H...Cg(4b)                     | 3.00          | 2.91             | 125           |
|                   | C23a-H...Cg(5b)                     | 2.98          | 2.88             | 143           |
|                   | $\square$ ... $\square$ interaction | Cg...Cg** (Å) | $D_{pln}$ ** (Å) | $\alpha$ **   |
|                   | Cg(2) ... Cg(3)                     | 4.04          | 3.37/3.63        | 11            |
| Cg(4b) ... Cg(4b) | 4.00                                | 3.51          | 0                |               |
| II                | C20a-H...Cg(1)                      | 2.75          | 2.75             | 154           |
|                   | C20b-H...Cg(1)                      | 2.78          | 2.77             | 147           |
|                   | C13-H...Cg(6a)                      | 2.77          | 2.69             | 164           |
|                   | C16-H...Cg(6a)                      | 2.98          | 2.78             | 140           |

\* H...Cg – distance from hydrogen atom to the center and  $D_{pln}$ - to the plane of aromatic cycle, C-H...Cg – the angle between C-H bond and the line connecting the center of aromatic cycle with H-atom.

\*\* Cg...Cg – center to center,  $D_{pln}$  – center to plane distance and  $\alpha$ - interplane angle for interacting cycles.

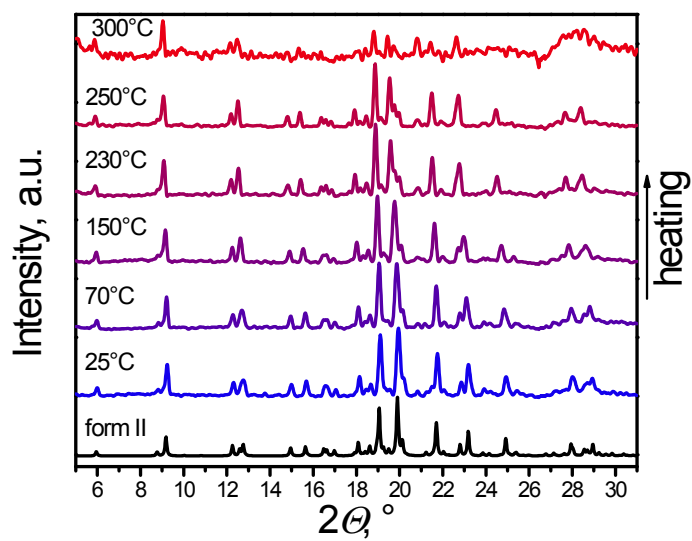

**Figure S7.** Variable-temperature X-ray diffraction patterns of form I after grinding in comparison with the pattern of form II (black) simulated from single crystal X-ray data.

## 5. Optical data

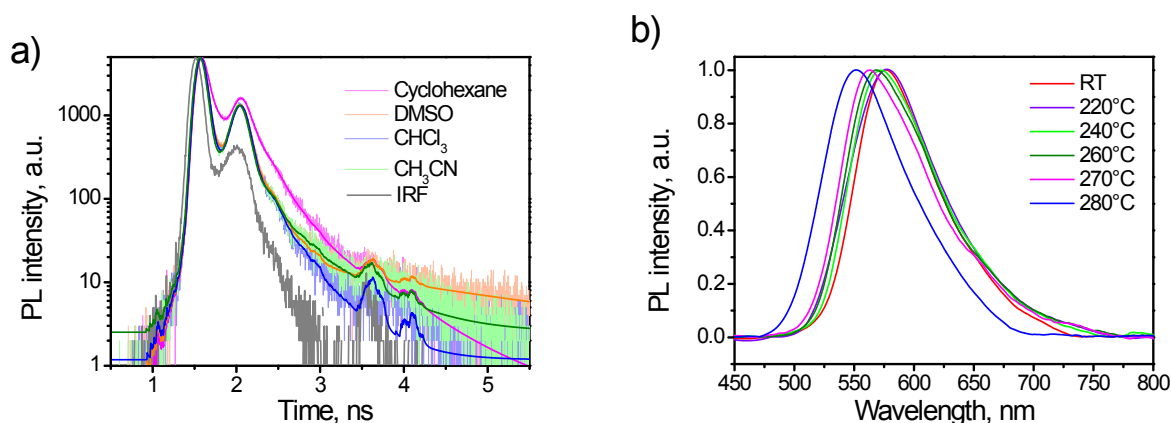

**Figure S8.** a) PL kinetics of BFMPT in various solvents; b) PL spectra of form I crystals after stepwise heating for 5 seconds at different temperatures: room temperature (red), 220°C (violet), 240°C (green), 260°C (olive), 270°C (magenta) and 280°C (blue).

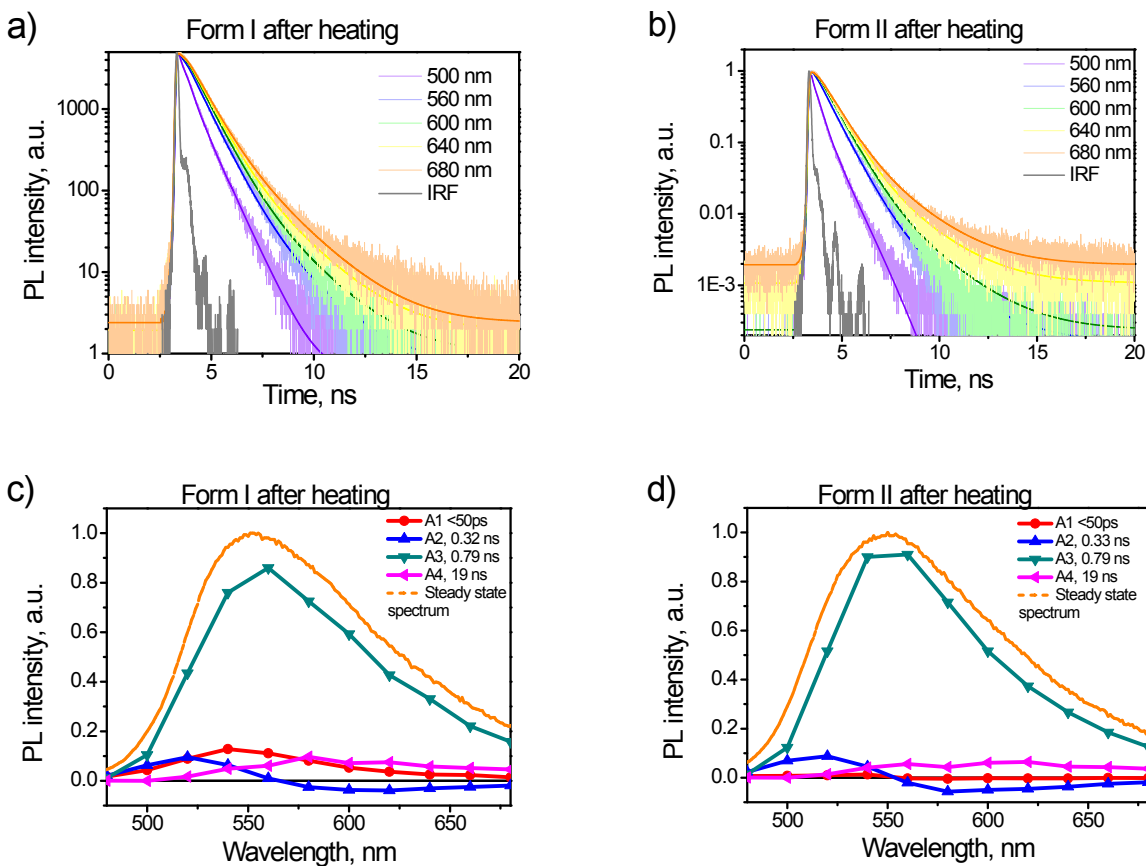

**Figure S9.** PL kinetics of BFMPT polymorphs after heating at 280°C for 5 seconds: PL time profiles recorded with form I after heating (a) and form II after heating (b) over the whole emission band after the excitation at 375 nm; the solid lines represent 4-exponential fits convoluted with instrument response function (IRF); decay associated spectra obtained from 4 exponential fit of fluorescence time profiles for form I after heating (c) and form II after heating (d) in comparison with steady-state spectra recorded using 375 nm laser excitation.



## 6. Quantum Chemical Calculations

### Computational details

BFMPT ground state geometry was fully optimised both in the gas and solvated phase at Density Functional Theory (DFT), using B3LYP<sup>1</sup> hybrid functional coupled with triple- $\zeta$  6-311++G\*\*<sup>2, 3</sup> basis set including third generation Grimme's empirical dispersion with Becke-Johnson damping (GD3BJ).<sup>4</sup> This level of theory was previously shown to successfully describe geometry of thiophene/phenylene co-oligomers.<sup>5, 6</sup> The initial guess for the atomic position was adopted from form I and form II crystal structures. Solvent effects were accounted by mean of the SMD solvation model.<sup>7</sup> Solvents were chosen amongst those used in the experiments, *viz.* chloroform, dimethylsulphoxide and acetonitrile; the standard values of static dielectric constant and refraction index at room temperature were used. The absence of imaginary frequencies was checked for optimised geometry in harmonic approximation and minima were found to be "genuine". Dipole and quadrupole moment were evaluated for optimised geometry using ChElPG (Charges from Electrostatic Potentials using a Grid-based)<sup>8</sup> scheme of population analysis with a refined integration grid (*vide infra*).

Analysis of possible dispersive intramolecular interactions of BFMPT was performed for ground state optimised geometry in the gas phase using Non-Covalent Interaction (NCI) index(*s*) along with Reduced Density Gradient (RDG).<sup>9</sup> Electron densities required for RDG computations were recalculated at relaxed geometry at B3LYP/6-311++G\*\* level of theory but with refined integration grid. Natural-Bond Orbital (NBO) analysis was also performed for electron density of relaxed single molecule evaluated at HF/6-311++G\*\* level of theory. Statistical contribution of various intermolecular interactions in crystal structures of form I and form II was evaluated using Hirshfeld surfaces analysis based on promolecular partitioning scheme.<sup>10</sup>

Potential Energy Surface (PES) of BFMPT in the gas phase and in solution was explored *via* relaxed scanning around  $\phi_1$  and  $\phi_3$  dihedral angles (see Fig. 2) starting from the initial optimised geometry with nine 10-degree steps in both clockwise and counterclockwise directions, at the same level of theory adopted for optimisations.

Electronic excited states were also investigated at Time-Dependent DFT (TD-DFT) level. Tamm-Dancoff Approximation (TDA)<sup>11</sup> was also tested. Two different hybrid (B3LYP, PBE0)<sup>12</sup> and their corresponding long-range corrected (CAM-B3LYP, LC- $\omega$ PBE)<sup>13</sup> functionals, coupled with the double- $\zeta$  6-31+G\*basis set<sup>14</sup> and two triple- $\zeta$  (*viz.* 6-311++G\*\* and Def2-TZVP<sup>15</sup>) basis sets were used. These calculations were run for the gas phase and used as a benchmarking with respect to the experimental UV-Vis absorption spectrum measured in the lowest polarity solvent (*i.e.* cyclohexane). As a result, TD-DFT CAM-B3LYP/6-311++G\*\* level of theory was shown to give the best match and hence chosen for further investigations of excited states in solution.

UV-Vis absorption spectra were simulated in chloroform, dimethylsulphoxide, and acetonitrile solution, accounting for the first ten singlet excited states. The energy of triplet states  $T_n$  ( $n = 1$  to 10) was also calculated in the ground state optimised geometry and alongside PES relaxed scan of around  $\phi_1$  and  $\phi_3$  dihedral angles. Solvent effects were included by means of the Polarizable Continuum Model (PCM) using the Integral Equation Formalism variant (IEFPCM).<sup>16</sup> PCM state specific perturbation theory both in equilibrium and non-equilibrium regimes was additionally tested for  $S_{1v}$  state. The standard Universal Force Field (UFF) radii were adopted to build up the cavity.

In order to understand the effects of surrounding molecules on the electronic excited states of BFMPT in the crystal, calculations were run at QM/MM level. TD-DFT CAM-B3LYP/6-311++G\*\* calculations were run for single molecules (QM) in geometries adopted from form I and form II crystal structures surrounded by classical charges (MM). The values of the classical charges were the same as computed *in vacuo* at DFT B3LYP/6-311++G\*\* level for single molecules in geometry adopted from form I and form II crystal structures, using the ChEIPG scheme of population analysis. The position of the classical charges in the space was the same as of nuclei of molecules in a neighbourhood within 3.0 Å from the central (QM) molecule in the crystal; this corresponds to the first coordination sphere.

The geometry of the first singlet excited state  $S_1$  was optimised in the gas phase at TD-DFT CAM-B3LYP/6-311++G\*\* level of theory.  $S_1$  PES was studied *via* relaxed scan around  $\phi_1$  dihedral angle from the  $S_{1r}$  initial optimised geometry with nine 10-degree steps in both clockwise and counterclockwise directions at TD-DFT B3LYP/6-311++G\*\* level of theory in the gas phase.

In order to investigate the nature of the intermolecular interactions in the crystals, models of neighbouring dimers of BFMPT in form I and form II were built from the X-ray data and investigated at B3LYP[GD3BJ]/6-31+G\* level of theory in the gas phase. The electron densities were computed and subsequently used for the RDG analysis. NBO Analysis was also carried out at HF/6-31+G\* level of theory. Exciton couplings and average diffusion lengths in BFMPT dimers were calculated using the same methodology described in ref.<sup>17</sup> For these calculations the excited state lifetime was assumed to be 10 ps.

Integration grid for the electronic density for RDG, NBO and population analyses was set to 150 radial shells and 974 angular points. In other cases, integration grid was set as 99 radial shells and 590 angular points. The convergence criteria for Self-Consistent Field were set to  $10^{-12}$  for root mean square (RMS) change in density matrix and  $10^{-10}$  for maximum change in density matrix. Convergence criteria for geometry optimisations were set to  $2 \times 10^{-6}$  a.u. for maximum force,  $1 \times 10^{-6}$  a.u. for RMS force,  $6 \times 10^{-6}$  a.u. for maximum displacement and  $4 \times 10^{-6}$  a.u. for RMS displacement.

All calculations were performed using GAUSSIAN G09.D01 package.<sup>18</sup> The post-processing electronic density topological analysis and the calculation of the RDG and electronic density Hessian calculation were performed using MultiWFN 3.3.9 package.<sup>19</sup> Hirshfield surface analysis was performed using Crystal Explorer 17.<sup>10</sup> Visualization was performed using GaussView (v. 5.0.8).

**Table S3.** Coordinates of BFMP ground state optimised geometry (gas phase). Level of theory: DFT B3LYP[GD3BJ]/6-311++G\*\*.

|   |             |             |             |
|---|-------------|-------------|-------------|
| S | 5.25862000  | 7.07656400  | 2.75517900  |
| C | 15.18753300 | 11.44381100 | 7.38674900  |
| H | 16.10459500 | 11.94193100 | 7.67915900  |
| C | 15.18310700 | 10.05836000 | 7.19956300  |
| H | 16.09634100 | 9.49439800  | 7.34934500  |
| C | 14.01651900 | 9.39496500  | 6.81776400  |
| H | 14.03116100 | 8.32154700  | 6.66618800  |
| C | 12.84960800 | 10.13044700 | 6.63592200  |
| C | 11.49520200 | 9.70444500  | 6.21217900  |
| C | 11.17539700 | 8.42078300  | 5.93710500  |
| H | 11.93532200 | 7.67623300  | 6.16380200  |
| C | 9.94831800  | 7.87231300  | 5.35946600  |
| C | 9.29364500  | 8.47863200  | 4.27652400  |
| H | 9.70186000  | 9.38725600  | 3.85282900  |
| C | 8.15699200  | 7.91425900  | 3.72000200  |
| H | 7.69442400  | 8.39220700  | 2.86425200  |
| C | 7.61717700  | 6.71896200  | 4.22404100  |
| C | 6.41731000  | 6.11725600  | 3.65013100  |
| C | 4.23067800  | 5.69115500  | 2.45878500  |
| C | 2.98966000  | 5.81633500  | 1.70030800  |
| C | 2.31705700  | 7.04433500  | 1.58259000  |
| H | 2.70697600  | 7.91967200  | 2.08901100  |
| C | 1.14158000  | 7.15162900  | 0.85669000  |
| H | 0.63141200  | 8.10483100  | 0.80297600  |
| C | 0.57895900  | 6.03559400  | 0.21879800  |
| C | -0.68498400 | 6.10926600  | -0.51409400 |
| H | -1.35732000 | 5.27376900  | -0.33203600 |
| C | -1.13121800 | 7.06178500  | -1.36223500 |
| C | -2.51281100 | 7.08943900  | -1.89694000 |
| C | -3.59178100 | 6.24176900  | -1.66680100 |
| H | -3.49729300 | 5.37880100  | -1.01735400 |
| C | -4.81251400 | 6.51561500  | -2.28454500 |
| H | -5.65797900 | 5.85876700  | -2.11655100 |
| C | -4.95785400 | 7.63107400  | -3.11469500 |
| H | -5.91519100 | 7.82971500  | -3.58233000 |
| C | 9.62232500  | 13.51739700 | 6.47659500  |
| H | 9.20284700  | 14.51273700 | 6.56654600  |
| C | 10.98421600 | 13.31540100 | 6.69709500  |
| H | 11.62403300 | 14.14617600 | 6.97214700  |
| C | 11.50251400 | 12.03056200 | 6.57697100  |
| C | 12.85724300 | 11.52929300 | 6.82554400  |
| C | 10.67315300 | 10.93905600 | 6.21457400  |
| C | 9.30741800  | 11.15079400 | 6.02935300  |
| H | 8.64221600  | 10.33183600 | 5.79668200  |
| C | 8.79127200  | 12.44056200 | 6.15923800  |
| H | 7.73015700  | 12.60618400 | 6.01369700  |
| C | 9.43185300  | 6.65622500  | 5.83630200  |
| H | 9.92766000  | 6.15803800  | 6.66233500  |
| C | 8.28226600  | 6.10157600  | 5.29681900  |
| H | 7.88323600  | 5.18808700  | 5.72006000  |
| C | 6.00453300  | 4.80495900  | 3.69971000  |
| H | 6.57661500  | 4.02849300  | 4.18893000  |
| C | 4.77952600  | 4.56602700  | 3.03140800  |
| H | 4.30502600  | 3.59521200  | 2.98828500  |
| C | 2.41794500  | 4.69463700  | 1.07631800  |
| H | 2.91930600  | 3.73640500  | 1.13316600  |
| C | 1.23014100  | 4.80030000  | 0.37053300  |
| H | 0.80835100  | 3.91830200  | -0.09906200 |
| C | -2.66273600 | 8.21512500  | -2.73545800 |
| C | -3.88314800 | 8.49037700  | -3.34412300 |
| H | -4.00181200 | 9.35582400  | -3.98611000 |
| C | -1.37411300 | 8.91053200  | -2.79995200 |
| C | -0.99086000 | 10.02459700 | -3.53875700 |
| H | -1.70784100 | 10.54959800 | -4.15966500 |
| C | 0.33690300  | 10.44677800 | -3.48418400 |
| H | 0.65162100  | 11.31314300 | -4.05437600 |
| C | 1.26879500  | 9.74772600  | -2.71357300 |
| H | 2.30304200  | 10.07125300 | -2.69795800 |
| C | 0.88795000  | 8.63432600  | -1.96385000 |
| H | 1.62983900  | 8.10194600  | -1.38637100 |
| C | -0.44339400 | 8.22014200  | -1.98281700 |
| C | 14.02367300 | 12.18951500 | 7.19863000  |
| H | 14.03301900 | 13.26403800 | 7.34194100  |

**Table S4.** Coordinates of BFMP ground state optimised geometry (chloroform). Level of theory: DFT B3LYP[GD3BJ]/6-311++G\*\* with SMD solvation model.

|   |             |             |             |
|---|-------------|-------------|-------------|
| S | 5.23030500  | 7.12786000  | 2.75521700  |
| C | 15.26681600 | 11.35316500 | 7.34801400  |
| H | 16.20356000 | 11.81961300 | 7.63689900  |
| C | 15.24261200 | 9.99530600  | 7.02481800  |
| H | 16.16095800 | 9.41788400  | 7.06597600  |
| C | 14.05602200 | 9.37406700  | 6.64478700  |
| H | 14.05874900 | 8.31986500  | 6.38412800  |
| C | 12.88619200 | 10.12514500 | 6.60157100  |
| C | 11.51269200 | 9.74666500  | 6.20848700  |
| C | 11.17962000 | 8.48649200  | 5.84927400  |
| H | 11.95714600 | 7.73524600  | 5.98435200  |
| C | 9.93671900  | 7.95371600  | 5.29796300  |
| C | 9.20097000  | 8.61550800  | 4.30673000  |
| H | 9.54761400  | 9.57209900  | 3.93115100  |
| C | 8.06229900  | 8.04671600  | 3.76227400  |
| H | 7.53974500  | 8.57756100  | 2.97193500  |
| C | 7.59902900  | 6.79480100  | 4.19124200  |
| C | 6.39966600  | 6.18474500  | 3.62710700  |
| C | 4.21624300  | 5.74947300  | 2.45446500  |
| C | 2.96890300  | 5.87674800  | 1.70770700  |
| C | 2.34351100  | 7.11850100  | 1.52513900  |
| H | 2.76989600  | 8.01216100  | 1.97127900  |
| C | 1.16608400  | 7.23062300  | 0.80593500  |
| H | 0.69476700  | 8.20238800  | 0.70516000  |
| C | 0.55215000  | 6.10360700  | 0.24511300  |
| C | -0.72254800 | 6.17492300  | -0.46513000 |
| H | -1.41746100 | 5.37584200  | -0.20830300 |
| C | -1.16282900 | 7.07297600  | -1.37431800 |
| C | -2.55217100 | 7.08800300  | -1.87731300 |
| C | -3.64678200 | 6.29874100  | -1.54125300 |
| H | -3.56114900 | 5.49930700  | -0.81144300 |
| C | -4.87123800 | 6.54637700  | -2.15600100 |
| H | -5.73074700 | 5.93253000  | -1.90521000 |
| C | -5.00805900 | 7.57805900  | -3.08645700 |
| H | -5.97221900 | 7.75654000  | -3.55234900 |
| C | 9.69593300  | 13.52215200 | 6.90732700  |
| H | 9.29001000  | 14.50856800 | 7.10912100  |
| C | 11.05983900 | 13.29095200 | 7.05496300  |
| H | 11.71998500 | 14.08810700 | 7.38337900  |
| C | 11.55787000 | 12.02045300 | 6.79193600  |
| C | 12.91481700 | 11.49393400 | 6.92693500  |
| C | 10.70734000 | 10.97686600 | 6.36098700  |
| C | 9.33966200  | 11.21686300 | 6.24498400  |
| H | 8.65396600  | 10.43033700 | 5.95515300  |
| C | 8.84406600  | 12.48920700 | 6.51721500  |
| H | 7.77881900  | 12.67686400 | 6.42579700  |
| C | 9.49483500  | 6.68329300  | 5.69779000  |
| H | 10.05661700 | 6.13701900  | 6.45022700  |
| C | 8.34237400  | 6.12520700  | 5.17490700  |
| H | 8.00995200  | 5.15867900  | 5.53798200  |
| C | 6.00159400  | 4.86886600  | 3.67078600  |
| H | 6.58143100  | 4.09188800  | 4.15477900  |
| C | 4.77778400  | 4.62460100  | 3.01267900  |
| H | 4.31560100  | 3.64591400  | 2.96371300  |
| C | 2.34677500  | 4.74529100  | 1.15838100  |
| H | 2.80469700  | 3.76832100  | 1.26948600  |
| C | 1.15483900  | 4.85610200  | 0.46481700  |
| H | 0.68938800  | 3.96209000  | 0.05979900  |
| C | -2.69529700 | 8.13023400  | -2.81182000 |
| C | -3.92021000 | 8.37948200  | -3.42050200 |
| H | -4.03118200 | 9.18344000  | -4.14191700 |
| C | -1.39707300 | 8.78393200  | -2.96534200 |
| C | -1.00950500 | 9.81879100  | -3.80796900 |
| H | -1.72994900 | 10.29901300 | -4.46311400 |
| C | 0.32269800  | 10.21972200 | -3.81104200 |
| H | 0.64278300  | 11.02635500 | -4.46325100 |
| C | 1.25326600  | 9.57981400  | -2.99282100 |
| H | 2.29400700  | 9.88731100  | -3.01928300 |
| C | 0.86748100  | 8.54809600  | -2.14110300 |
| H | 1.61264000  | 8.06099300  | -1.52435700 |
| C | -0.46851700 | 8.15427400  | -2.10584700 |
| C | 14.10233100 | 12.11390400 | 7.29889900  |
| H | 14.12656800 | 13.17091600 | 7.54578300  |

**Table S5.** Coordinates of BFMP ground state optimised geometry (acetonitrile). Level of theory: DFT B3LYP[GD3BJ]/6-311++G\*\* with SMD solvation model.

|   |             |             |             |
|---|-------------|-------------|-------------|
| S | 5.20997500  | 7.16290800  | 2.75572900  |
| C | 15.32832000 | 11.29466300 | 7.30798500  |
| H | 16.27667600 | 11.74231100 | 7.58888700  |
| C | 15.27966900 | 9.94406100  | 6.95474100  |
| H | 16.19084500 | 9.35392500  | 6.96548700  |
| C | 14.07802700 | 9.34545200  | 6.58398500  |
| H | 14.06224800 | 8.29676900  | 6.30255800  |
| C | 12.91670100 | 10.11249500 | 6.58036300  |
| C | 11.52962500 | 9.76055700  | 6.20861100  |
| C | 11.18024600 | 8.51239400  | 5.81929500  |
| H | 11.95725700 | 7.75472900  | 5.91568300  |
| C | 9.92739400  | 7.99102800  | 5.28346500  |
| C | 9.13116200  | 8.69176000  | 4.36802000  |
| H | 9.43293700  | 9.67912000  | 4.03649300  |
| C | 7.98488600  | 8.12473900  | 3.83767300  |
| H | 7.41326900  | 8.69441600  | 3.11061400  |
| C | 7.57454900  | 6.83400500  | 4.20299100  |
| C | 6.36880800  | 6.22609800  | 3.65047000  |
| C | 4.18251200  | 5.78812800  | 2.48314100  |
| C | 2.93952400  | 5.91043100  | 1.72830600  |
| C | 2.32736300  | 7.15398800  | 1.51320400  |
| H | 2.75915400  | 8.05522100  | 1.93864100  |
| C | 1.15458200  | 7.25996400  | 0.78471800  |
| H | 0.69464300  | 8.23435600  | 0.65982500  |
| C | 0.53320700  | 6.12500600  | 0.24796200  |
| C | -0.73617600 | 6.18342700  | -0.47201900 |
| H | -1.42668600 | 5.38158200  | -0.21204100 |
| C | -1.17725000 | 7.06589200  | -1.39693200 |
| C | -2.56273500 | 7.05408000  | -1.91143100 |
| C | -3.64874800 | 6.25274100  | -1.57317300 |
| H | -3.55671700 | 5.46393800  | -0.83250800 |
| C | -4.87156200 | 6.47524500  | -2.20183700 |
| H | -5.72444300 | 5.85261100  | -1.94970800 |
| C | -5.01549300 | 7.49208200  | -3.14871000 |
| H | -5.97846400 | 7.65018600  | -3.62449600 |
| C | 9.78053000  | 13.54131000 | 7.05278400  |
| H | 9.39338900  | 14.52757900 | 7.28955900  |
| C | 11.14493600 | 13.28860900 | 7.15862200  |
| H | 11.82633100 | 14.06695700 | 7.48888100  |
| C | 11.61749000 | 12.01803100 | 6.85068300  |
| C | 12.97023600 | 11.47269000 | 6.93843300  |
| C | 10.74300800 | 10.99525400 | 6.41535300  |
| C | 9.37572400  | 11.25710100 | 6.34147400  |
| H | 8.67026300  | 10.48926500 | 6.04953500  |
| C | 8.90482300  | 12.52880300 | 6.65940100  |
| H | 7.84010500  | 12.73222600 | 6.60010900  |
| C | 9.53790600  | 6.68366400  | 5.61700100  |
| H | 10.15114900 | 6.10549800  | 6.30235300  |
| C | 8.38015000  | 6.12420300  | 5.10783100  |
| H | 8.09967600  | 5.12252500  | 5.41534800  |
| C | 5.95710600  | 4.91463400  | 3.71974800  |
| H | 6.52389200  | 4.14182300  | 4.22492700  |
| C | 4.73245100  | 4.66862100  | 3.06426900  |
| H | 4.26171800  | 3.69312700  | 3.03366400  |
| C | 2.30894900  | 4.77074900  | 1.20473900  |
| H | 2.75429200  | 3.79167800  | 1.34510200  |
| C | 1.12172700  | 4.87652200  | 0.50212200  |
| H | 0.64714400  | 3.97746000  | 0.11962300  |
| C | -2.71283600 | 8.07968800  | -2.86354700 |
| C | -3.93606400 | 8.30415400  | -3.48637900 |
| H | -4.05015300 | 9.09614800  | -4.22053700 |
| C | -1.42205700 | 8.74730700  | -3.01835100 |
| C | -1.04349300 | 9.77278900  | -3.87716100 |
| H | -1.76701900 | 10.22980400 | -4.54553000 |
| C | 0.28336000  | 10.19263000 | -3.87716700 |
| H | 0.59746200  | 10.99212700 | -4.54107000 |
| C | 1.21638700  | 9.58102500  | -3.03917800 |
| H | 2.25251000  | 9.90419000  | -3.06184700 |
| C | 0.83896000  | 8.55886700  | -2.17152000 |
| H | 1.58686200  | 8.09671200  | -1.53914800 |
| C | -0.49163200 | 8.14479700  | -2.14046000 |
| C | 14.17255800 | 12.07081800 | 7.30053700  |
| H | 14.21215500 | 13.12140500 | 7.57220500  |

**Table S6.** Coordinates of BFMP ground state optimised geometry (dimethylsulphoxide). Level of theory: DFT B3LYP[GD3BJ]/6-311++G\*\* with SMD solvation model.

|   |             |             |             |
|---|-------------|-------------|-------------|
| S | 5.29445300  | 7.12455200  | 2.69196700  |
| C | 15.24608700 | 11.28141100 | 7.54824200  |
| H | 16.17763000 | 11.73147000 | 7.87735000  |
| C | 15.19689200 | 9.91091900  | 7.28375800  |
| H | 16.09090200 | 9.30815100  | 7.41041000  |
| C | 14.01664900 | 9.30775200  | 6.85628200  |
| H | 14.00017800 | 8.24217000  | 6.64753600  |
| C | 12.87695800 | 10.09163200 | 6.70511700  |
| C | 11.51622000 | 9.73631400  | 6.25019600  |
| C | 11.17001000 | 8.47055400  | 5.92043100  |
| H | 11.91939900 | 7.70711800  | 6.12643700  |
| C | 9.94695000  | 7.94076500  | 5.32679800  |
| C | 9.24413500  | 8.59398700  | 4.30581300  |
| H | 9.60483800  | 9.54309000  | 3.92495700  |
| C | 8.11785600  | 8.02443200  | 3.73698800  |
| H | 7.62019400  | 8.55095700  | 2.92786300  |
| C | 7.63586000  | 6.78023600  | 4.16882500  |
| C | 6.44155900  | 6.17606400  | 3.58868700  |
| C | 4.26531900  | 5.75502100  | 2.39915200  |
| C | 3.02304100  | 5.88825100  | 1.64551900  |
| C | 2.41824600  | 7.13651000  | 1.43673500  |
| H | 2.85959600  | 8.03423400  | 1.85984200  |
| C | 1.23867200  | 7.25203500  | 0.72134500  |
| H | 0.78304500  | 8.22975600  | 0.60871300  |
| C | 0.60219900  | 6.12237300  | 0.19061400  |
| C | -0.67868800 | 6.18324000  | -0.50540800 |
| H | -1.34729500 | 5.35870000  | -0.25985000 |
| C | -1.16237100 | 7.08650300  | -1.38877100 |
| C | -2.56154900 | 7.05686100  | -1.86333100 |
| C | -3.61639700 | 6.21622600  | -1.52222200 |
| H | -3.48305000 | 5.40535500  | -0.81222700 |
| C | -4.86219000 | 6.42794100  | -2.10745900 |
| H | -5.69136400 | 5.77490500  | -1.85322100 |
| C | -5.05967500 | 7.47279500  | -3.01304000 |
| H | -6.04029700 | 7.62251600  | -3.45426500 |
| C | 9.78680000  | 13.59307200 | 6.69673800  |
| H | 9.40335500  | 14.59935100 | 6.83470500  |
| C | 11.13385500 | 13.32753600 | 6.92292700  |
| H | 11.80414500 | 14.11680400 | 7.24997300  |
| C | 11.60190400 | 12.03172500 | 6.73914200  |
| C | 12.93132500 | 11.47255900 | 6.97182300  |
| C | 10.74182400 | 10.99466800 | 6.30935900  |
| C | 9.38947100  | 11.27140600 | 6.11534200  |
| H | 8.69164600  | 10.49623400 | 5.82418400  |
| C | 8.92229600  | 12.56902600 | 6.30933000  |
| H | 7.86921300  | 12.78356000 | 6.15593700  |
| C | 9.49123600  | 6.67364300  | 5.72404100  |
| H | 10.03288400 | 6.13137000  | 6.49382500  |
| C | 8.35142200  | 6.11399100  | 5.17568600  |
| H | 8.00827500  | 5.15025400  | 5.53652600  |
| C | 6.02676500  | 4.86549000  | 3.64387000  |
| H | 6.58923500  | 4.08766400  | 4.14686900  |
| C | 4.80716700  | 4.62901400  | 2.97521300  |
| H | 4.33428200  | 3.65503800  | 2.93122800  |
| C | 2.37988600  | 4.75418400  | 1.12537600  |
| H | 2.81845400  | 3.77144000  | 1.26124300  |
| C | 1.18698400  | 4.86975000  | 0.43482500  |
| H | 0.70140200  | 3.97438000  | 0.05747400  |
| C | -2.76484300 | 8.10927800  | -2.77531400 |
| C | -4.01168300 | 8.32396600  | -3.35280300 |
| H | -4.16787400 | 9.13774100  | -4.05467200 |
| C | -1.49608000 | 8.81377400  | -2.94412900 |
| C | -1.16868000 | 9.87620300  | -3.77838900 |
| H | -1.92301300 | 10.33716200 | -4.40898800 |
| C | 0.14693000  | 10.32885600 | -3.80359400 |
| H | 0.42118400  | 11.15788200 | -4.44869400 |
| C | 1.11932500  | 9.71298200  | -3.01528500 |
| H | 2.14628900  | 10.06228500 | -3.05808200 |
| C | 0.79339400  | 8.65368400  | -2.17182200 |
| H | 1.57208400  | 8.18992200  | -1.57905000 |
| C | -0.52542300 | 8.20601600  | -2.11440100 |
| C | 14.11251600 | 12.07429000 | 7.39221100  |
| H | 14.15333500 | 13.14010200 | 7.59599300  |

**Table S7.** Values of the ground,  $S_{1v}$  (Franck-Condon region) and  $S_{1r}$  states electric dipole moment ( $\mu$ ; in Debye) and the diagonal components of the quadrupole moment ( $\Theta_{\alpha\alpha}$ ,  $\alpha = x, y, z$  referring to the standard orientation of the molecule; in Debye  $\cdot$  Ångström) evaluated for BFMPT molecule, optimised in the gas phase and in the various solvents (chloroform, acetonitrile, dimethylsulphoxide)

|                                 | $\mu / \text{D}$ | $\Theta_{xx} / (\text{D} \cdot \text{Å})$ | $\Theta_{yy} / (\text{D} \cdot \text{Å})$ | $\Theta_{zz} / (\text{D} \cdot \text{Å})$ |
|---------------------------------|------------------|-------------------------------------------|-------------------------------------------|-------------------------------------------|
| Gas phase ( $S_0$ )             | 1.4535           | -264.783                                  | -265.734                                  | 280.922                                   |
| Chloroform ( $S_0$ )            | 2.3345           | -282.675                                  | -271.186                                  | -241.798                                  |
| Acetonitrile ( $S_0$ )          | 2.6954           | -284.693                                  | -272.282                                  | -240.158                                  |
| Dimethylsulphoxide ( $S_0$ )    | 2.8420           | -284.166                                  | -263.532                                  | -249.155                                  |
| Gas phase ( $S_{1v}$ )          | 3.1284           | -279.124                                  | -262.114                                  | -234.572                                  |
| Chloroform ( $S_{1v}$ )         | 3.3161           | -301.919                                  | -278.008                                  | -248.706                                  |
| Acetonitrile ( $S_{1v}$ )       | 3.7800           | -310.140                                  | -284.671                                  | -249.264                                  |
| Dimethylsulphoxide ( $S_{1v}$ ) | 3.8024           | -303.082                                  | -280.768                                  | -247.762                                  |
| Gas phase ( $S_{1r}$ )          | 1.8810           | -285.624                                  | -270.204                                  | -249.298                                  |

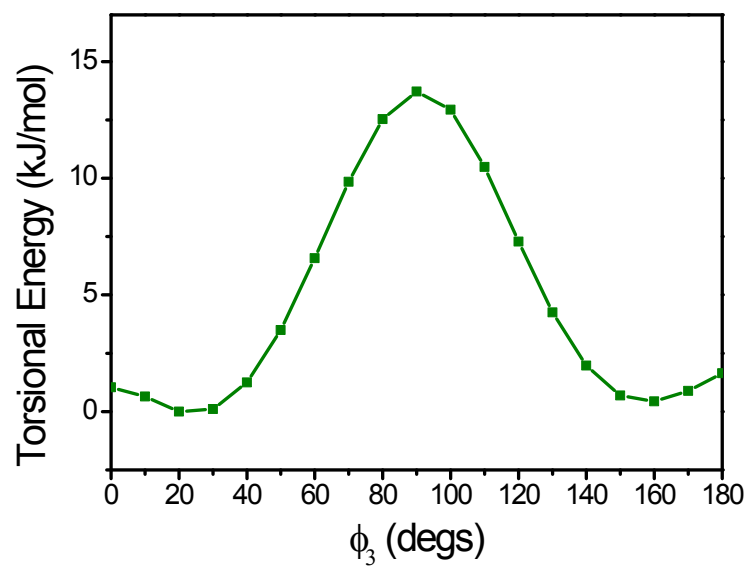

**Figure S10.** Ground state potential energy of BFMPPT evaluated as a function of  $\phi_3$  dihedral angle. Level of theory: DFT B3LYP[GD3BJ]/6-311++G\*\*.



**Table S8.** Deviation of TD (TDA) calculated transition energy (in eV). using different combinations of functionals and basis sets. for the brightest absorption band with respect to the experimental UV-Vis absorption data for BFMPT. Geometry optimised at DFT B3LYP[GD3BJ]/6-311++G\*\* level of theory.

| TD         |          |           |          |                  |
|------------|----------|-----------|----------|------------------|
| Basis set  | B3LYP    | CAM-B3LYP | PBE0     | LC- $\omega$ PBE |
| 6-31+G*    | -0.41331 | 0.10519   | -0.29381 | 0.46029          |
| 6-311++G** | -0.43081 | 0.09689   | -0.29151 | 0.43339          |
| Def2-TZVP  | -0.43971 | 0.08459   | -0.30921 | 0.42789          |
| TDA        |          |           |          |                  |
|            | B3LYP    | CAM-B3LYP | PBE0     | LC- $\omega$ PBE |
| 6-31+G*    | -0.34911 | 0.19899   | -0.24381 | 0.58139          |
| 6-311++G** | -0.36651 | 0.17749   | -0.22561 | 0.55619          |
| Def2-TZVP  | -0.36121 | 0.17959   | -0.24081 | 0.54919          |

**Table S9.** Ground to  $S_{1v}$  state excitation energy (in eV) computed in (a) linear response (LR) nonequilibrium (neq) solvation regime. (b) state-specific (SS) equilibrium (eq) solvation regime. and (c) state specific nonequilibrium solvation regime. Geometry optimised at DFT B3LYP[GD3BJ]/6-311++G\*\* level of theory with SMD solvent simulation. Excited states computed at TD CAM-B3LYP/6-311++G\*\* level of theory.

|                    | LR/neq | SS/eq  | SS/neq |
|--------------------|--------|--------|--------|
| Chloroform         | 3.1105 | 3.0462 | 3.0863 |
| Acetonitrile       | 3.0897 | 2.9721 | 3.0214 |
| Dimethylsulphoxide | 3.0125 | 3.0211 | 3.0501 |

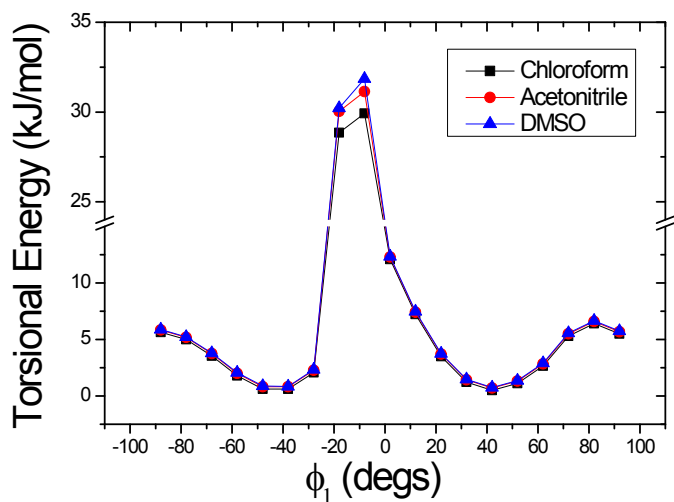

**Figure S11.** Ground state potential energy of BFMPT evaluated as a function of  $\phi_1$  dihedral angle evaluated at a set of different solvents (chloroform, acetonitrile, dimethylsulphoxide). Level of theory: DFT B3LYP[GD3BJ]/6-311++G\*\* with SMD solvation model.

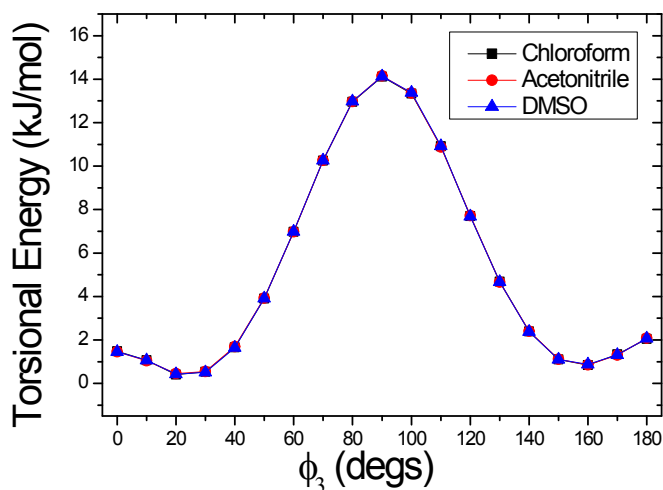

**Figure S12.** Ground state potential energy surface of BFMPT evaluated as a function of  $\phi_3$  dihedral angle evaluated at a set of different solvents (chloroform, acetonitrile, dimethylsulphoxide). Level of theory: DFT B3LYP[GD3BJ]/6-311++G\*\* with SMD solvation model.

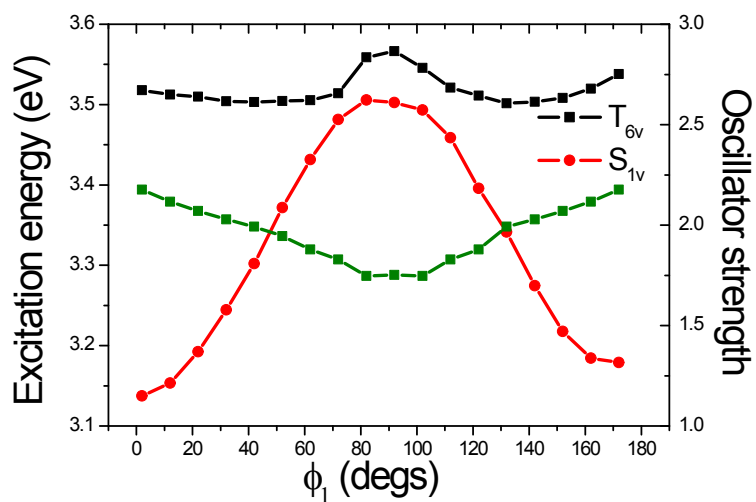

**Figure S13.** Relative energy (with respect to energy of ground state) of the vertically excited states  $T_{6v}$  (black squares) and  $S_{1v}$  (red circles) evaluated along  $\phi_1$  PES scan of BFMPT. The oscillator strength for the transition from ground to  $S_{1v}$  state is also depicted (green squares).

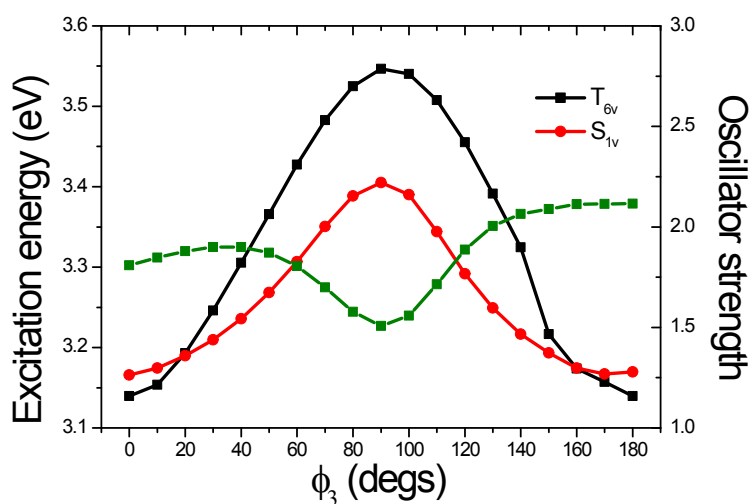

**Figure S14.** Relative energy (with respect to energy of ground state) of  $T_{6v}$  (red circles) and  $S_{1v}$  vertical excited levels (black squares) evaluated along  $\phi_3$  PES scan of BFMPT. Green line represents the oscillator strength of  $S_{1v}$  state.

**Table S10.** Inductive (*i*) and orientational (*o*) contributions to the solvatochromic shift (in eV), due to the change of the electric dipole moment ( $\mu$ ) and quadrupole moment ( $\Theta$ ). Lippert-Mataga, McRae and Suppan models were employed using quantum mechanical values of dipole and quadrupole moments (for the GS and the ES).

|              | $\Delta E(\mu)$ |          | $\Delta E(\Theta)$ |          |
|--------------|-----------------|----------|--------------------|----------|
|              | <i>i</i>        | <i>o</i> | <i>i</i>           | <i>o</i> |
| Chloroform   | 9.71E-05        | 1.80E-03 | 7.06E-03           | 4.04E-02 |
| DMSO         | 6.49E-05        | 4.55E-03 | 4.15E-03           | 8.98E-02 |
| Acetonitrile | 6.02E-04        | 4.99E-03 | 3.22E-02           | 8.26E-02 |

**Table S11.** Coordinates of BFMPT  $S_1$  state optimised geometry (gas phase). Fluorescence energy: 2.2358 eV.

|   |             |             |             |
|---|-------------|-------------|-------------|
| S | 5.26427300  | 7.20376300  | 2.62697500  |
| C | 15.26100700 | 11.42706500 | 7.25066400  |
| H | 16.19930800 | 11.89929000 | 7.51605000  |
| C | 15.25505700 | 10.10626000 | 6.80639400  |
| H | 16.18895800 | 9.56226100  | 6.73089100  |
| C | 14.06492600 | 9.48023000  | 6.45438100  |
| H | 14.08088200 | 8.45591700  | 6.10085100  |
| C | 12.87455700 | 10.18680300 | 6.56276300  |
| C | 11.48592600 | 9.79098900  | 6.23558100  |
| C | 11.17431600 | 8.56525100  | 5.76431600  |
| H | 11.98471100 | 7.84042500  | 5.77306500  |
| C | 9.93022100  | 8.03363100  | 5.22850900  |
| C | 9.04924400  | 8.78504900  | 4.43693000  |
| H | 9.28397800  | 9.81661100  | 4.21054800  |
| C | 7.91049300  | 8.22330100  | 3.90495000  |
| H | 7.26736300  | 8.83845000  | 3.28694400  |
| C | 7.58003500  | 6.87263800  | 4.13598400  |
| C | 6.38482700  | 6.28488500  | 3.59704400  |
| C | 4.19518700  | 5.82762500  | 2.41783200  |
| C | 3.00091800  | 5.91209900  | 1.67183300  |
| C | 2.57869600  | 7.12646700  | 1.05707500  |
| H | 3.16541600  | 8.02626000  | 1.20013300  |
| C | 1.44282500  | 7.19781000  | 0.31034200  |
| H | 1.13866800  | 8.14971900  | -0.10088700 |
| C | 0.60807900  | 6.05251700  | 0.10757900  |
| C | -0.58765600 | 6.07006200  | -0.62305400 |
| H | -1.25263100 | 5.23338300  | -0.41968600 |
| C | -1.08516400 | 7.01143900  | -1.53093800 |
| C | -2.50407100 | 7.16077300  | -1.80832300 |
| C | -3.61123900 | 6.50682900  | -1.26510000 |
| H | -3.49084600 | 5.72850000  | -0.52047000 |
| C | -4.88273500 | 6.86850800  | -1.68900700 |
| H | -5.74852800 | 6.36228400  | -1.27880100 |
| C | -5.06048000 | 7.88180800  | -2.63206100 |
| H | -6.06174800 | 8.15283300  | -2.94504900 |
| C | 9.61011600  | 13.39848100 | 7.46289500  |
| H | 9.19204300  | 14.34102200 | 7.79561700  |
| C | 10.98744800 | 13.21308100 | 7.46314100  |
| H | 11.64560100 | 14.00213600 | 7.80792800  |
| C | 11.50073400 | 11.99912100 | 7.03472200  |
| C | 12.88505700 | 11.51661600 | 7.01053100  |
| C | 10.65380200 | 10.96724900 | 6.58016700  |
| C | 9.27581400  | 11.15494600 | 6.61840300  |
| H | 8.59436600  | 10.36946300 | 6.32556300  |
| C | 8.76367600  | 12.37105000 | 7.05661800  |
| H | 7.69051500  | 12.51718900 | 7.08435700  |
| C | 9.62862400  | 6.67383500  | 5.41886300  |
| H | 10.30945700 | 6.05847600  | 5.99616500  |
| C | 8.48348900  | 6.11066100  | 4.90617800  |
| H | 8.28547700  | 5.06429500  | 5.09706800  |
| C | 5.92807400  | 4.97410500  | 3.73504500  |
| H | 6.46319900  | 4.22284800  | 4.29759600  |
| C | 4.73081700  | 4.71752400  | 3.09060000  |
| H | 4.24987400  | 3.75051200  | 3.10344600  |
| C | 2.14288900  | 4.77869200  | 1.51733100  |
| H | 2.40434900  | 3.84161900  | 1.99038200  |
| C | 0.99931000  | 4.85368700  | 0.78658400  |
| H | 0.36837000  | 3.97750600  | 0.68817900  |
| C | -2.69135600 | 8.18845000  | -2.76297200 |
| C | -3.96321900 | 8.54983900  | -3.17194900 |
| H | -4.11172200 | 9.33879600  | -3.90059400 |
| C | -1.36909000 | 8.67429300  | -3.14997900 |
| C | -0.98722400 | 9.61163400  | -4.09192300 |
| H | -1.72955000 | 10.17016500 | -4.65081300 |
| C | 0.37009400  | 9.81667200  | -4.33364200 |
| H | 0.68181300  | 10.54675700 | -5.07100500 |
| C | 1.32831800  | 9.06569500  | -3.65443000 |
| H | 2.37869600  | 9.20952900  | -3.87844500 |
| C | 0.95615100  | 8.12484300  | -2.70351200 |
| H | 1.71710600  | 7.53102300  | -2.21556800 |
| C | -0.39987200 | 7.94369200  | -2.40957500 |
| C | 14.07376700 | 12.14295200 | 7.35394900  |
| H | 14.08351900 | 13.17091500 | 7.69722600  |

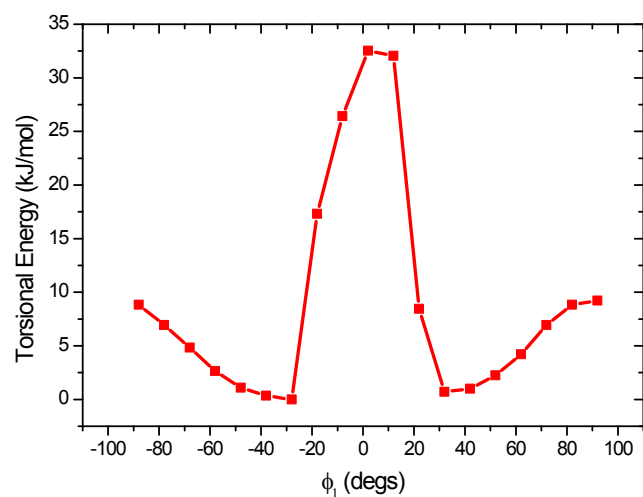

**Figure S15.** Relaxed scan of potential energy of  $S_{1r}$  state as a function of  $\phi_1$  dihedral angle. Level of theory: DFT B3LYP[GD3BJ]/6-311++G\*\*.

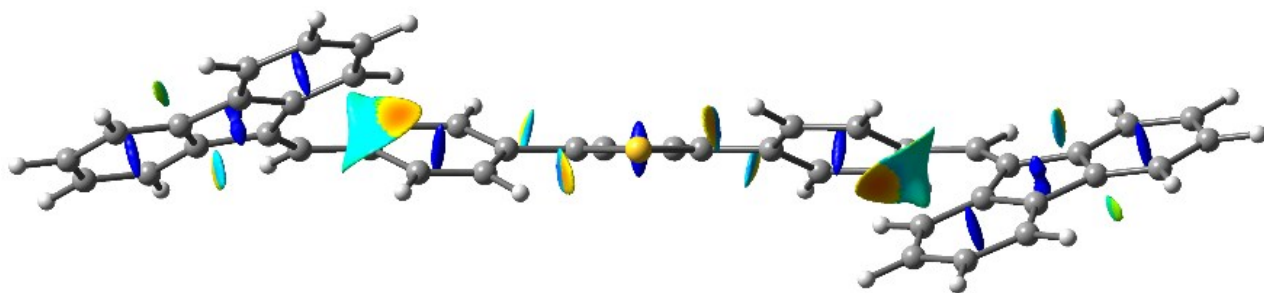

**Figure S16.** Plot of the RDG isosurfaces ( $s = 0.5$  a.u. and a red-to-blue colour scale from  $-0.015$  a.u.  $\leq \text{sign}(\lambda_2) \rho(\mathbf{r}) \leq +0.015$  a.u.) calculated for BFMPT optimised geometry. Blue colour stands for repulsion, yellow/orange for (weak) attraction.

**Table S12.** Statistical contribution of various intermolecular contacts in form I and form II X-ray structures based on Hirshfeld surface analysis.

|       | Form I | Form II |
|-------|--------|---------|
| C...C | 5.1    | 4.2     |
| H...H | 45.2   | 46.0    |
| S...S | 0.0    | 0.0     |
| C...H | 45.8   | 46.3    |
| C...S | 0.4    | 0.0     |
| H...S | 3.5    | 3.5     |

## 7. References

1. A. D. Becke, *J. Chem. Phys.*, 1993, **98**, 5648–5652.
2. A. D. McLean and G. S. Chandler, *J. Chem. Phys.*, 1980, **72**, 5639–5648.
3. R. Krishnan, J. S. Binkley, R. Seeger and J. A. Pople, *J. Chem. Phys.*, 1980, **72**, 650–654.
4. S. Grimme, S. Ehrlich and L. Goerigk, *J. Comput. Chem.*, 2011, **32**, 1456–1465.
5. I. P. Koskin, E. A. Mostovich, E. Benassi and M. S. Kazantsev, *J. Phys. Chem. C*, 2017, **121**, 23359–23369.
6. I. P. Koskin, E. A. Mostovich, E. Benassi and M. S. Kazantsev, *Chem. Commun.*, 2018, **54**, 7235–7238
7. A. V. Marenich, C. J. Cramer and D. G. Truhlar, *J. Phys. Chem. B*, 2009, **113**, 6378–6396.
8. C. M. Breneman and K. B. Wiberg, *J. Comp. Chem.*, 1990, **11**, 361–373.
9. E. R. Johnson, S. Keinan, P. Mori-Sánchez, J. Contreras-García, A. J. Cohen and W. Yang, *J. Am. Chem. Soc.*, 2010, **132**, 6498–6506.
10. M. J. Turner, J. J. McKinnon, S. K. Wolff, D. J. Grimwood, P. R. Spackman, D. Jayatilaka and M. A. Spackman, *Crystal Explorer 17*, 2017.
11. F. Trani, G. Scalmani, G. S. Zheng, I. Carnimeo, M. J. Frisch and V. Barone, *J. Chem. Theory Comput.*, 2011, **7**, 3304–3313.
12. J. P. Perdew, M. Ernzerhof and K. Burke, *J. Chem. Phys.*, 1996, **105**, 9982–9985.
13. T. Yanai, D. P. Tew and N. C. Handy, *Chem. Phys. Lett.*, 2004, **393**, 51–57.
14. R. Ditchfield, W. J. Henre and J. A. Pople, *J. Chem. Phys.*, 1971, **54**, 724–728.
15. F. Weigend and R. Ahlrichs, *Phys. Chem. Chem. Phys.*, 2005, **7**, 3297–3305.
16. G. Scalmani and M. J. Frisch, *J. Chem. Phys.*, 2010, **132**, 114110.
17. E. Benassi and S. Corni, *J. Phys. Chem. C*, 2013, **117**, 25026–25041.
18. M. J. Frisch, G. W. Trucks, H. B. Schlegel, G. E. Scuseria, M. A. Robb, J. R. Cheeseman, G. Scalmani, V. Barone, G. A. Petersson, H. Nakatsuji, X. L. Caricato, M. A. Marenich, J. Bloino, B. G. Janesko, R. Gomperts, B. Mennucci, H. P. Hratchian, J. V. Ortiz, A. F. Izmaylov, J. L. Sonnenberg, D. Williams-Young, F. Ding, F. Lipparini, F. Egidi, J. Goings, B. Peng, A. Petrone, T. Henderson, D. Ranasinghe, V. G. Zakrzewski, J. Gao, N. Rega, G. Zheng, W. Liang, M. Hada, M. Ehara, K. Toyota, R. Fukuda, J. Hasegawa, M. Ishida, T. Nakajima, Y. Honda, O. Kitao, H. Nakai, T. Vreven, K. Throssell, J. A. Montgomery, J. Peralta, J. E. P. Ogliaro, M. Bearpark, J. J. Heyd, E. Brothers, K. N. Kudin, V. N. Staroverov, T. Keith, R. Kobayashi, J. Normand, K. Raghavachari, A. Rendell, J. C. Burant, S. S. Iyengar, J. Tomasi, M. Cossi, J. M. Millam, M. Klene, C. Adamo, R. Cammi, J. W. Ochterski, R. L. Martin, K. Morokuma, O. Farkas, J. B. Foresman and F. D. J., *Gaussian 09, Revision A.02*, 2016.
19. T. Lu and F. Chen, *J. Comput. Chem.*, 2012, **33**, 580–592.
